# Supplementary material for: Exploring the Usability of α-MSH-SM-Liposome as an Imaging Agent to Study Biodegradable Bone Implants In Vivo
Source: MDPI journal article supplement (doi:10.3390/ijms24021103), 2023-01-06
Supplement: s1 [file s1]

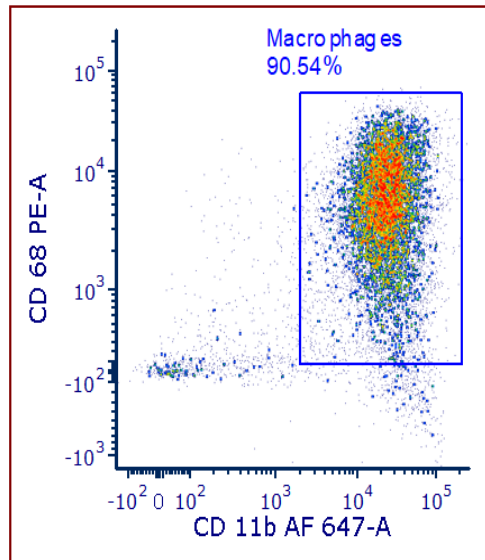

**Figure S1.** FACS analysis of BMDM purity of >90% (CD 68—P.E. for macrophages, CD 11b—Alexa flour 647 for hematopoietic cells).

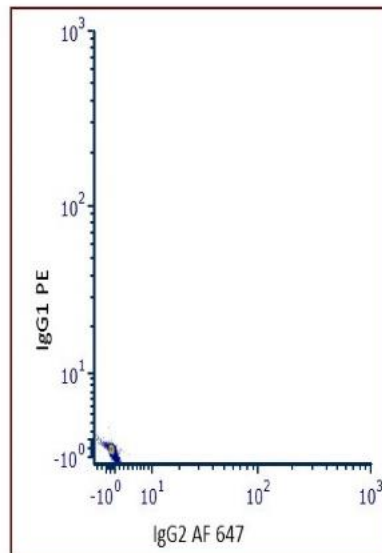

**Figure S2.** Isotype staining of BMDM with IgG1-PE and IgG2-AF 647.
